# Supplementary material for: A high flexibility all-solid contact sulfide selective electrode using a graphene transducer
Source: Royal Society of Chemistry journal article supplement (doi:10.1039/d0ay00420k), 2020-01-01
Supplement: d0ay00420k1.pdf [file d0ay00420k1.pdf]

## Supporting Information

### A High Flexibility All-Solid Contact Sulfide Selective Electrode Using a Graphene Transducer

Xiangyi Ye <sup>a,b,c,d</sup>, Peng Qi <sup>a,c,d</sup>, Yan Sun <sup>a,c,d</sup>, Dun Zhang\* <sup>a,c,d</sup> and Yan Zeng <sup>a,c,d</sup>

*a. CAS Key Laboratory of Marine Environmental Corrosion and Bio-fouling, Institute of Oceanology, Chinese Academy of Science, Qingdao 266071, China.*

*b. University of Chinese Academy of Sciences, Beijing 100049, China.*

*c. Qingdao National Laboratory for Marine Science and Technology, Qingdao 266237, China.*

*d. Center for Ocean Mega-Science, Chinese Academy of Science, Qingdao 266071, China.*

\* Corresponding authors, Dun Zhang ([zhangdun@qdio.ac.cn](mailto:zhangdun@qdio.ac.cn)) and Peng Qi ([qipeng@qdio.ac.cn](mailto:qipeng@qdio.ac.cn))

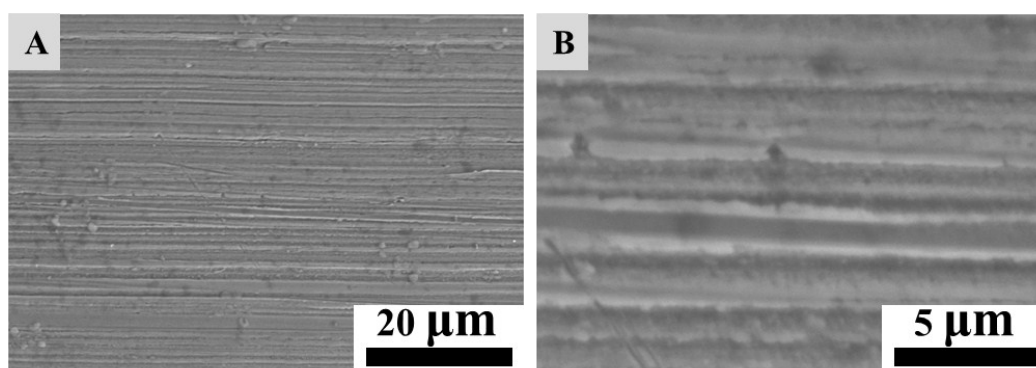

Fig. S1 SEM morphology of bare Ag wire with different magnification sizes

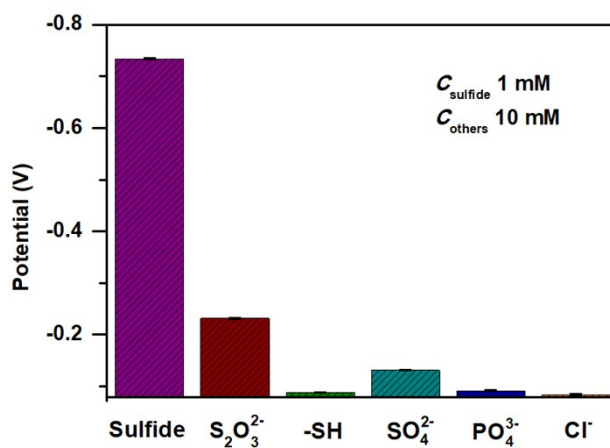

Fig. S2 Response potential of the ASC-ISEs in sulfide and interfering ion aqueous solutions.
